# Supplementary material for: Anti-Cancer Effects of YAP Inhibitor (CA3) in Combination with Sorafenib against Hepatocellular Carcinoma (HCC) in Patient-Derived Multicellular Tumor Spheroid Models (MCTS)
Source: MDPI journal article supplement (doi:10.3390/cancers14112733), 2022-05-31
Supplement: s1 [file s1]

Figure 2.

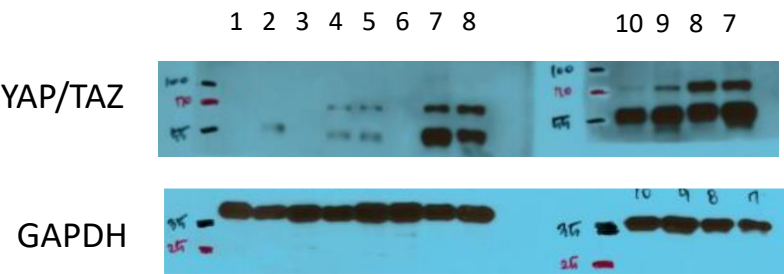

Figure 6A.

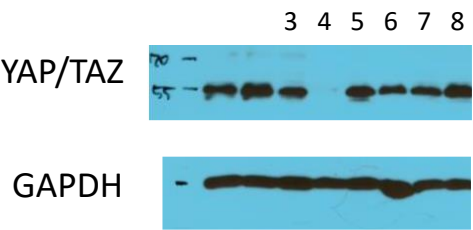

Figure 6B.

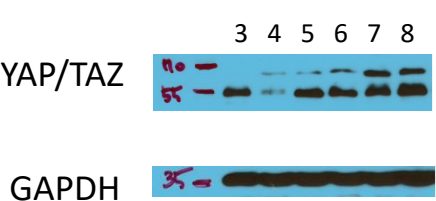

Figure 7.

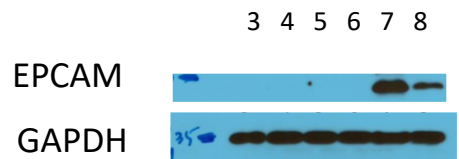

Figure S1. Expanded, uncropped original western blot panels from Figures 2-7.
